## QUANTITATIVE ANALYSIS OF RESTING MEMBRANE ELECTROGENESIS IN INSECT (DIPTERA) SKELETAL MUSCLE

### I. INTRACELLULAR $K^+$ , $Na^+$ AND $Cl^-$ ACTIVITIES, MEASURED USING LIQUID ION-EXCHANGER AND NEUTRAL ION-CARRIER MICROELECTRODES

BY JILL DAWSON AND M. B. A. DJAMGOZ

*Department of Pure and Applied Biology, Neurobiology Group,  
Imperial College, London SW7 2BB*

*Accepted 29 December 1987*

#### Summary

Electrophysiological properties of skeletal body-wall muscles of prepupal *Calliphora erythrocephala* were investigated using double-barrelled intracellular ion-sensitive microelectrodes. The most realistic estimate of the intracellular  $K^+$  activity, obtained using  $K^+$ -sensitive microelectrodes based on a neutral carrier, was  $115 \text{ mmol l}^{-1}$ . The  $K^+$  equilibrium potential was consistently more negative than the prevailing resting potential, the average difference being  $-15 \text{ mV}$ . The intracellular  $Na^+$  activity and the  $Na^+$  equilibrium potential were  $7 \text{ mmol l}^{-1}$  and  $+46 \text{ mV}$  on average, respectively. The mean value of the intracellular  $Cl^-$  activity was  $40 \text{ mmol l}^{-1}$ , and this was apparently higher than that required for passive distribution of  $Cl^-$ . However, when reversibly exposed to a Ringer containing no  $Cl^-$ , cells could rapidly exchange most of their intracellular  $Cl^-$ , although the resting membrane potentials were only transiently affected. It is concluded that an anionic interferent exists inside muscles, that this artefactually elevates the measured intracellular  $Cl^-$  activities, and that  $Cl^-$  makes no contribution to resting membrane electrogenesis.

#### Introduction

Electrophysiological properties of insect muscles, particularly ionic parameters, have been studied for many years (for recent reviews see Piek & Nijio, 1979; Pichon & Ashcroft, 1985; Djamgoz, 1987). Insect skeletal muscles seem to be bathed directly in the haemocoelomic fluids, which have markedly different ionic compositions in the different orders. In most exopterygotes and carnivorous endopterygotes (e.g. Diptera), the ionic composition of the haemolymph is such that the  $Na^+ : K^+$  ratio is high, the levels of  $Ca^{2+}$  and  $Mg^{2+}$  are relatively low, and the prevailing transmembrane ionic gradients are 'conventional'. In contrast, in

Key words: muscle, membrane, insect, ion-sensitive microelectrode.

many phytophagous insects, especially Lepidoptera, the haemolymph has a relatively low  $\text{Na}^+:\text{K}^+$  ratio and is high in  $\text{Ca}^{2+}$  and  $\text{Mg}^{2+}$ , giving 'unconventional' ionic gradients (see Djamgoz, 1987). Thus, insects comprise interesting 'model' systems as regards the electrophysiology of their cell membranes. The neural inputs to insect muscles have been shown to involve both amino acid and modulatory peptide(s) (Usherwood & Cull-Candy, 1975; Piek, 1985). Consequently, insect muscle preparations are also proving to be useful in elucidating the actions and interactions of novel, endogenous neuroactive compounds, for which a thorough understanding of ionic properties is crucial. Finally, since many insect species are pests, such an understanding is also essential for evaluating the modes of action of insecticides. In these respects, the skeletal muscles of larval insects offer some unique experimental advantages. First, cells may be very large, measuring some hundreds of micrometres. Consequently, the cells can be impaled with microelectrodes (several, if necessary) without causing significant damage, and electrical problems associated with ultrafine microelectrodes can be avoided, making the interpretation of data straightforward. Second, many cells are superficially situated in the body, so they are readily accessible to microelectrodes. Furthermore, the cells are free of any connective tissue, and are therefore maximally exposed to bathing media and respond readily to solution changes.

In several early studies, the ionic contents of extracted myoplasm of insect muscles were studied using methods (such as flame photometry) which measured *concentrations* (see Djamgoz, 1987). Detailed knowledge of intracellular ion *activities* is surprisingly limited, however, and is lacking for Diptera muscle. This paper describes intracellular  $\text{K}^+$ ,  $\text{Cl}^-$  and  $\text{Na}^+$  activity measurements in skeletal muscles of the larval blowfly, an example of an insect with a 'conventional' haemolymph. Together with the following paper, it leads to the quantitative testing of a model of resting membrane electrogenesis. Preliminary reports of these measurements have been given to the Physiological Society (Dawson & Djamgoz, 1983, 1984*a,b*).

## Materials and methods

### *The preparation*

Experiments were carried out on larvae of *Calliphora erythrocephala* Meig (Diptera). Final instar larvae approaching pupation (i.e. prepupae) were used. At this stage the muscle cells lose their ability to contract whilst apparently retaining normal resting potentials and general membrane responsiveness. Each maggot was dissected dorsally to expose the ventral body-wall muscles (Fig. 1). Preparations were bathed in Rice's saline, containing (in  $\text{mmol l}^{-1}$ ): NaCl, 173; KCl, 13.5;  $\text{MgCl}_2$ , 1.0;  $\text{NaHCO}_3$ , 1.2;  $\text{NaH}_2\text{PO}_4$ , 0.8;  $\text{CaCl}_2$ , 0.9; glucose, 55.5 (pH 7.0, checked daily; Finlayson & Osborne, 1970). Preparations were allowed to equilibrate at room temperature (18–20°C) for at least 30 min in the saline prior to impalement of cells. Ventral longitudinal body-wall muscles 6A and 7A were used for all measurements (Crossley, 1965; Hardie, 1976; see Fig. 1).

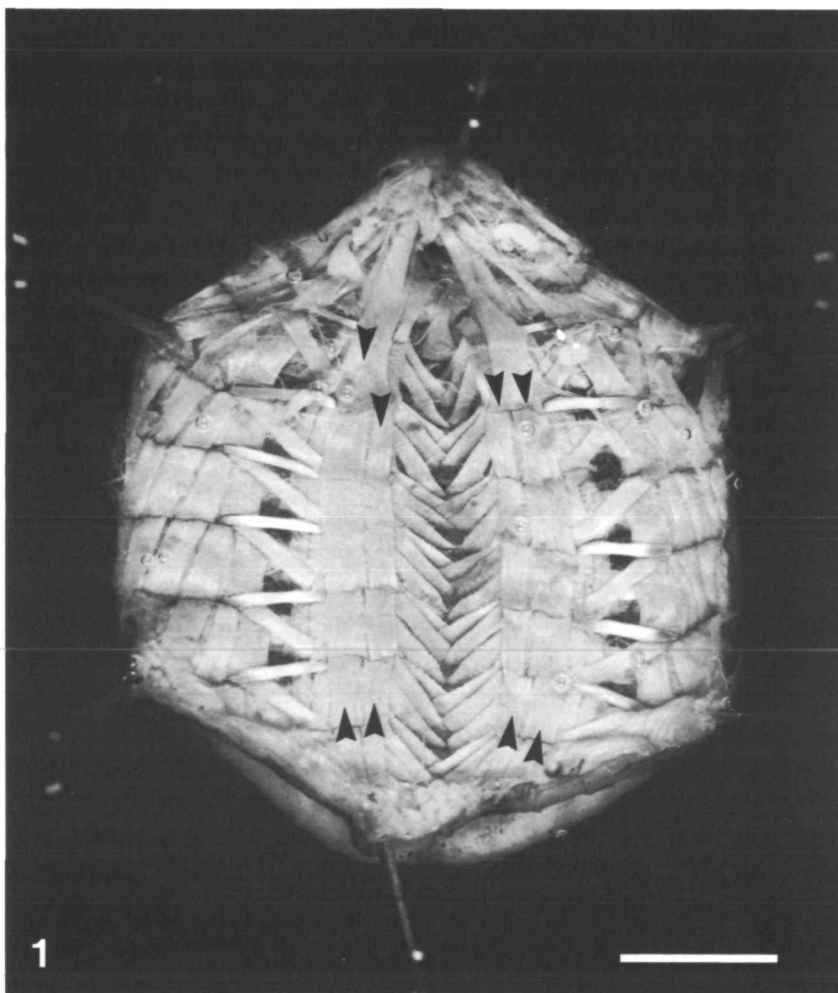

Fig. 1. A prepupal preparation of *Calliphora erythrocephala*. The prepupa was dissected from the dorsal side to expose the ventral body-wall muscles. The arrowheads denote the two pairs of double bands (6A and 7A) of longitudinal muscle cells used for this study. The preparation was immersed in Bouin's fixative for clarity of illustration. Scale bar, 2 mm.

#### *Ion-sensitive microelectrodes*

Double-barrelled ion-sensitive microelectrodes (ISMs), based on a variety of liquid sensors, were constructed and used as described in detail previously (Djamgoz & Dawson, 1986; Djamgoz & Laming, 1987*a,b*). Briefly, lengths of borosilicate glass capillary tube (1.0 and 1.5 mm, o.d.) were glued together with Araldite, twisted through 180° in the middle in a vertical electrode puller and then pulled in a modified Livingstone-type horizontal puller. The inside of the larger barrel was silanized by exposing the opening to the vapour of dimethyldichlorosilane (Sigma). The tip of this barrel was plugged with a column of liquid ion

sensor (0.1 mm to a few mm in length) and back-filled with the appropriate salt solution (see below). The filamented reference barrel was filled by direct injection of solution using a 30 gauge needle and syringe. Details of the liquid sensors and back-filling solutions for the three types of ISM were as follows.

#### *K<sup>+</sup>-sensitive microelectrodes*

Both the 'classical' ion-exchanger (LIX; Corning 477317) and the valinomycin-based neutral carrier (NIC) were used (Walker, 1971; Oehme & Simon, 1976; Tsien, 1980). 0.5 mol l<sup>-1</sup> KCl was used as the back-filling solution in the active barrel, and reference barrels were filled with 5 mol l<sup>-1</sup> LiCl.

#### *Cl<sup>-</sup>-sensitive microelectrodes*

The improved Cl<sup>-</sup> exchanger, Corning 477913, was used (Baumgarten, 1981). Active barrels were back-filled with 0.5 mol l<sup>-1</sup> KCl. The reference liquid ion exchanger (RLIE) solution of Thomas & Cohen (1981) was found to be ideal for the reference barrels (see Djamgoz & Dawson, 1986).

#### *Na<sup>+</sup>-sensitive microelectrodes*

The neutral Na<sup>+</sup> carrier ETH227 was used (Steiner, Oehme, Ammann & Simon, 1979). The active barrel was back-filled with 0.5 mol l<sup>-1</sup> NaCl, and the reference barrel was filled with 1 mol l<sup>-1</sup> KCl.

Active barrels employing ion-exchangers and neutral carriers had tip resistances in the ranges 10–90 GΩ and 60–160 GΩ, respectively. Reference barrels filled with inorganic electrolyte solutions, and those filled with the RLIE, had tip resistances in the ranges 50–200 MΩ and 10–50 GΩ, respectively. Ion-sensitive microelectrodes were connected to a dual/differential electrometer (WPI 223A), the outputs of which were monitored on a chart recorder. The reference electrode was a short length of 1.5 mm o.d. capillary tubing filled with 'solid' 3 % agar in Rice's saline into which the chlorided end of a silver wire was inserted and connected to earth. The same electrode was used for the calibration of the ISM and earthing of the preparation. The potential difference between the earth electrode and the reference barrel of a given ISM was stable to within ±2 mV in all ionic substitution solutions used in a given experiment.

K<sup>+</sup>-sensitive microelectrodes (K<sup>+</sup>-SMs) were calibrated in a series of solutions based on Rice's saline, in which the K<sup>+</sup> concentration varied from 1.35 to 135 mmol l<sup>-1</sup>, using Na<sup>+</sup> as the substitute. Intracellular K<sup>+</sup> activities were derived by direct reference of the K<sup>+</sup>-SM potential to the microelectrode's calibration curve. Cl<sup>-</sup>-sensitive microelectrodes (Cl<sup>-</sup>-SMs) were calibrated similarly using gluconate (sodium salt) as the substitute; extra Ca<sup>2+</sup> was added to compensate for sequestration of Ca<sup>2+</sup> by gluconate (Kenyon & Gibbons, 1977; Vaughan-Jones, 1979). Intracellular Cl<sup>-</sup> activities were derived again by direct reference of the Cl<sup>-</sup>-SM potential to the respective calibration curve. Calibration solutions for Na<sup>+</sup>-sensitive microelectrodes (Na<sup>+</sup>-SMs) were not based on Ringer's solutions, however, since the latter contained a high level of Ca<sup>2+</sup> which is known to interfere

with the  $\text{Na}^+$  carrier ETH227 (Steiner *et al.* 1979). Instead, the calibration solutions were designed to include a constant background of interference approximating the intracellular medium, i.e.  $152.8 \text{ mmol l}^{-1}$  KCl,  $2.8 \text{ mmol l}^{-1}$   $\text{MgCl}_2$ ,  $0.014 \text{ mmol l}^{-1}$   $\text{CaCl}_2$  and  $2.8 \text{ mmol l}^{-1}$  Hepes (Deitmer & Schlue, 1983). Since normal Rice's saline was not included as one of the steps in the calibration solutions, the potential recorded by the  $\text{Na}^+$ -SM in the medium bathing the preparation was meaningless. It was therefore necessary to take the *difference* between the reference level, 0 mV (corresponding to  $100 \text{ mmol l}^{-1}$   $\text{Na}^+$ , the highest  $\text{Na}^+$  concentration in the calibration solutions) and the intracellular potential recorded by the  $\text{Na}^+$ -SM, and refer this directly to the calibration graph to give the intracellular  $\text{Na}^+$  activity. All ISMs used in this study responded to a 10-fold change in the activity of the primary ion sensed by giving a potential change of 50 mV or greater in the range  $10\text{--}100 \text{ mmol l}^{-1}$ , and 35 mV or greater in the range  $1\text{--}10 \text{ mmol l}^{-1}$ . Importantly, the calibration of a given ISM before and after an experiment agreed to within  $\pm 5 \text{ mV}$  in all solutions, such that the 'shallow' end of a calibration could be used reliably (also, see below). *Activity* is a fraction of a given concentration, representing mobile ions that contribute to electrochemical phenomena. ISMs measure activities directly, and throughout the text activity values have been given for consistency. However, assuming that the intracellular activity coefficient for  $\text{K}^+$ ,  $\text{Na}^+$  and  $\text{Cl}^-$  is the same as in Rice's saline (i.e. 0.72), then corresponding concentration values can be derived by simple division (Weast, 1971). All data in the text are given as means  $\pm$  standard errors.

#### *Criteria for the selection of results*

The following conditions were met in selecting and evaluating the results obtained with ion-sensitive microelectrodes. (i) The calibrations of a given ISM before and after experiments were within  $\pm 5 \text{ mV}$  of each other at all points. Most calibrations agreed to within  $\pm 2 \text{ mV}$ . (ii) Prior to the impalement of a cell, the levels of potential and ionic activity in the recording chamber were steady to within  $\pm 1 \text{ mV}$  for at least 2 min, again to ensure that the ISM was giving a steady response. (iii) The changes in the voltage readings of the ISM upon impalement of a cell were abrupt, indicating a non-damaging penetration. (iv) The intracellular potentials recorded were steady for longer than 2 min to ensure that the membrane had formed a tight seal around the ISM. In fact, steady impalements and recordings were frequently obtained for several hours. (v) Cells had membrane potentials of at least  $-30 \text{ mV}$ . (vi) The means and distributions of membrane potentials obtained from a given preparation were similar when measured using a conventional microelectrode or an ISM, again to indicate the absence of any damage by the relatively coarse double-barrelled ISMs.

## **Results**

### *Intracellular potassium activities*

A recording of the impalement of a maggot muscle cell with a double-barrelled NIC-type  $\text{K}^+$ -SM is illustrated in Fig. 2. The lower trace shows the membrane

potential ( $E_M$ ), which was  $-40$  mV for this cell, and the upper trace records the intracellular  $K^+$  activity ( $aK_i$ ),  $115 \text{ mmol l}^{-1}$ . Averages and frequency distributions of data obtained with both NIC and LIX-type  $K^+$ -SMs are given in Table 1 and Fig. 3.  $aK_i$  values measured using NIC-type  $K^+$ -SMs were distributed normally in the range  $68\text{--}210 \text{ mmol l}^{-1}$  (98 % of values falling between 68 and  $170 \text{ mmol l}^{-1}$ ), with a mean value of  $115 \text{ mmol l}^{-1}$ . However, using LIX-type  $K^+$ -SMs, a much wider range ( $150\text{--}760 \text{ mmol l}^{-1}$ ) and a much higher mean value of  $aK_i$  ( $382 \text{ mmol l}^{-1}$ ) were recorded (Fig. 3; Table 1). The latter measurements are highly likely to have been erroneous and a possible cause of this is given in the Discussion.

The values of the  $K^+$  equilibrium potential ( $E_K$ ) obtained using NIC-type  $K^+$ -SMs were in the range  $-49$  to  $-77$  mV (mean value,  $-62$  mV). Resting potentials ( $E_M$ ) varied between  $-34$  and  $-63$  mV (mean value,  $-47$  mV) (Fig. 4). For every

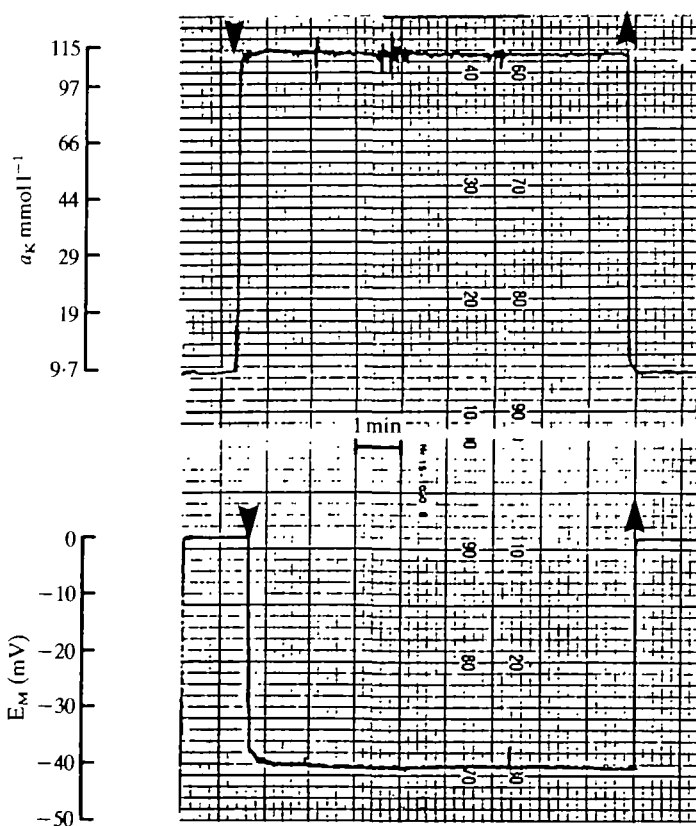

Fig. 2. Chart recording of the impalement of a prepupal *Calliphora* muscle cell with a double-barrelled NIC-type  $K^+$ -sensitive microelectrode. Upper trace,  $K^+$  activity ( $a_K$ ); lower trace, membrane potential ( $E_M$ ). The moment of impalement of the cell is marked by downward-pointing arrowheads (these do not coincide due to an offset in the positions of the recorder pens). At the point marked by upward-pointing arrowheads, the microelectrode was withdrawn from the cell.

Table 1. Intracellular ionic activity data from *Calliphora prepupae*

|                                 | NIC     | LIX      |
|---------------------------------|---------|----------|
| $aK_i$ (mmol l <sup>-1</sup> )  | 115 ± 3 | 382 ± 12 |
| $E_K$ (mV)                      | -62 ± 1 | —        |
| $E_M$ (mV)                      | -47 ± 1 | -50 ± 1  |
| $E_K - E_M$ (mV)                | -15 ± 1 | —        |
| $aNa_i$ (mmol l <sup>-1</sup> ) | 7 ± 1   |          |
| $E_{Na}$ (mV)                   | 76 ± 2  |          |
| $E_M$ (mV)                      | 46 ± 1  |          |
| $E_{Na} - E_M$ (mV)             | 122 ± 3 |          |
| $aCl_i$ (mmol l <sup>-1</sup> ) | 40 ± 2  |          |
| $E_{Cl}$ (mV)                   | -31 ± 1 |          |
| $E_M$ (mV)                      | -50 ± 1 |          |
| $E_{Cl} - E_M$ (mV)             | 19 ± 1  |          |

Symbols have been defined in the text.

K<sup>+</sup> data from 96 cells, seven preparations (LIX-type K<sup>+</sup>-SMs); 85 cells, 10 preparations (NIC-type K<sup>+</sup>-SMs).

Na<sup>+</sup> data from 43 cells, six preparations.

Cl<sup>-</sup> data from 35 cells, six preparations. All data are given as means ± s.e.

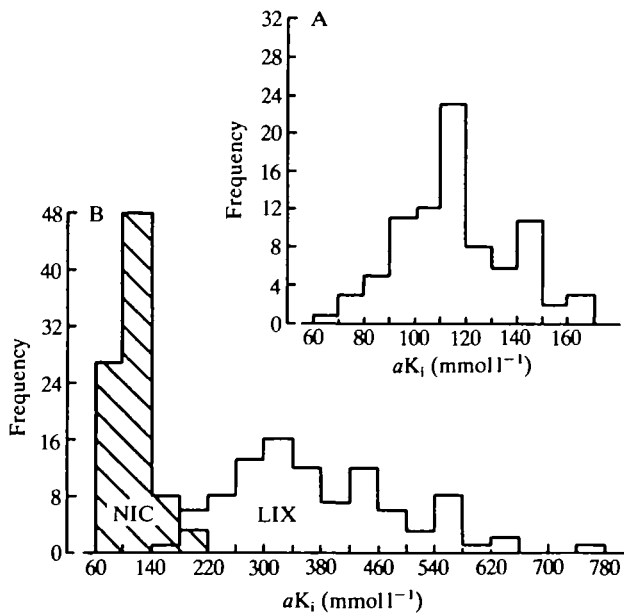

Fig. 3. Frequency histograms illustrating: (A) the distributions of intracellular K<sup>+</sup> activity ( $aK_i$ ) values measured using NIC-type K<sup>+</sup>-sensitive microelectrodes; and (B) a comparison of  $aK_i$  values obtained using LIX- and NIC-type K<sup>+</sup>-SMs, plotted on the same abscissa.

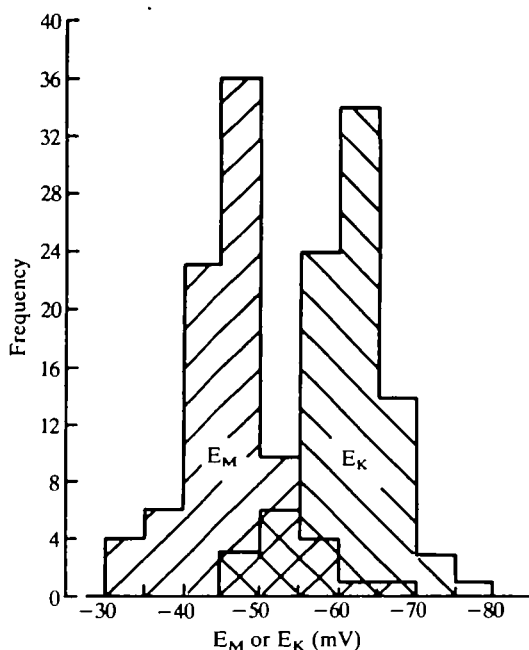

Fig. 4. Frequency histograms illustrating the distributions of the resting membrane potential ( $E_M$ ) and  $K^+$  equilibrium potential ( $E_K$ ) values, measured using NIC-type  $K^+$ -SMs. Data are plotted on the same abscissa for comparison.

cell tested, however,  $E_K$  was more negative than the corresponding  $E_M$ , the average difference being  $-15$  mV (Table 1).  $E_K$  values have not been calculated for the data obtained using LIX-type  $K^+$ -SMs, since the latter are not likely to reflect the real situation in these cells, as already noted.

Thus, since  $E_K$  values were consistently and significantly more negative than  $E_M$  values,  $K^+$  cannot be the only ion involved in resting membrane electrogenesis. At least one other ion with an equilibrium potential more *positive* than  $E_M$  must also play a part.

#### *Intracellular sodium activities*

A successful impalement of a cell with a double-barrelled  $Na^+$ -SM is shown in Fig. 5. As in Fig. 2, the lower trace gives the membrane potential, and the upper trace corresponds to  $Na^+$  activity. This cell had an  $E_M$  of  $-46$  mV, and its intracellular  $Na^+$  activity ( $aNa_i$ ) was  $9$  mmol  $l^{-1}$ . The frequency distribution of the population of  $aNa_i$  values measured is shown in Fig. 6. The values of  $aNa_i$  varied from  $1$  to  $15$  mmol  $l^{-1}$ , with a mean value of  $7$  mmol  $l^{-1}$  (Table 1). The calculated values of the  $Na^+$  equilibrium potential ( $E_{Na}$ ) were consistently positive, covering a wide range ( $57$ – $117$  mV). The mean value of  $E_{Na}$  was  $76$  mV and the average difference between  $E_{Na}$  and  $E_M$  was  $122$  mV (Table 1).

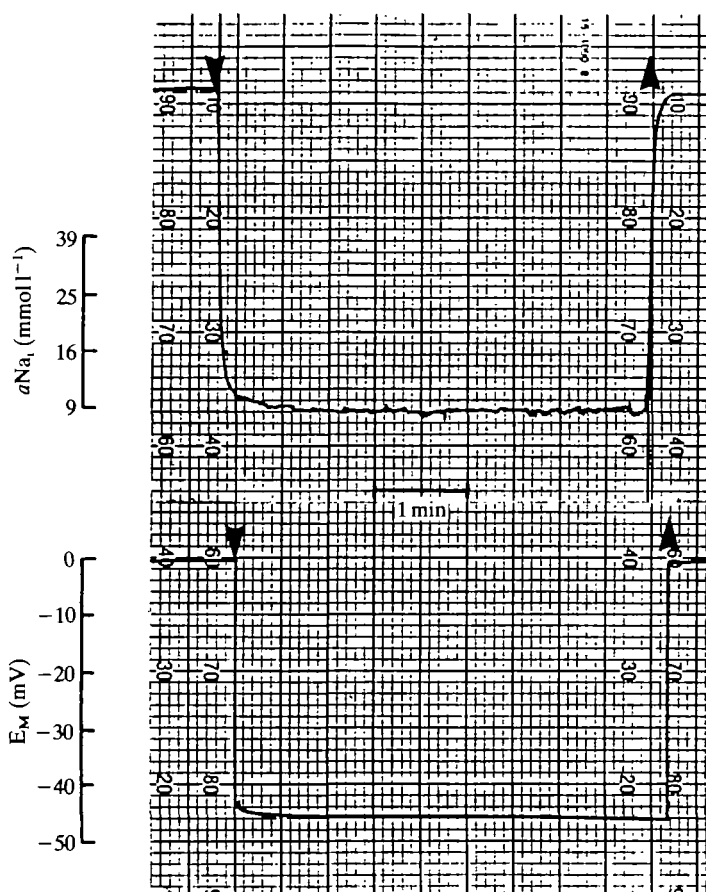

Fig. 5. Chart recording of the impalement of a *Calliphora* prepupal muscle cell with a double-barrelled  $\text{Na}^+$ -sensitive microelectrode. Details of symbols etc. are as in the legend of Fig. 2.

#### *Intracellular chloride activities and the effect of reducing extracellular chloride activity*

A typical, simultaneous recording of membrane potential and intracellular  $\text{Cl}^-$  activity ( $a\text{Cl}_i$ ) in a cell is shown in Fig. 7. Again, the lower trace denotes the membrane potential ( $-48\text{ mV}$ ), and the upper trace records the  $a\text{Cl}_i$  ( $30\text{ mmol l}^{-1}$ ). Average data are given in Table 1, and the frequency distribution of the  $a\text{Cl}_i$  values found is shown in Fig. 8. The histogram has a range of  $29\text{--}66\text{ mmol l}^{-1}$ , with all values but one falling between  $29$  and  $53\text{ mmol l}^{-1}$ , and a mean value of  $40\text{ mmol l}^{-1}$  (Fig. 8; Table 1). The calculated values of  $\text{Cl}^-$  equilibrium potentials ( $E_{\text{Cl}}$ ) were in the range  $-18$  to  $-39\text{ mV}$ , such that for every cell  $E_{\text{Cl}}$  was apparently more positive than the corresponding  $E_{\text{M}}$ . However, there is no clear relationship between  $E_{\text{Cl}}$  and  $E_{\text{M}}$  (Fig. 9).

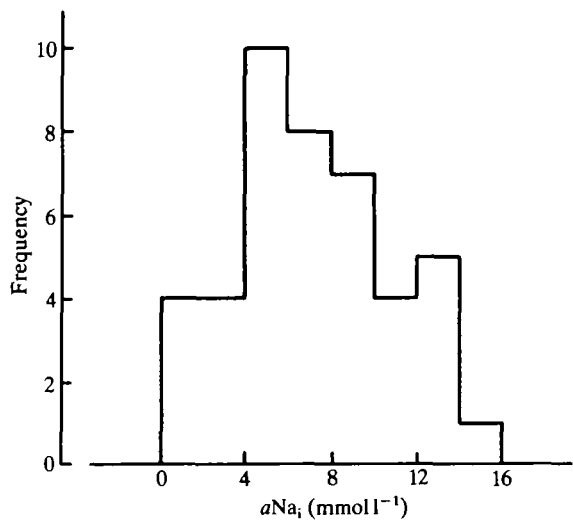

Fig. 6. Frequency histogram illustrating the distribution of intracellular Na<sup>+</sup> activity ( $a\text{Na}_i$ ) values, measured using a double-barrelled Na<sup>+</sup>-sensitive microelectrode.

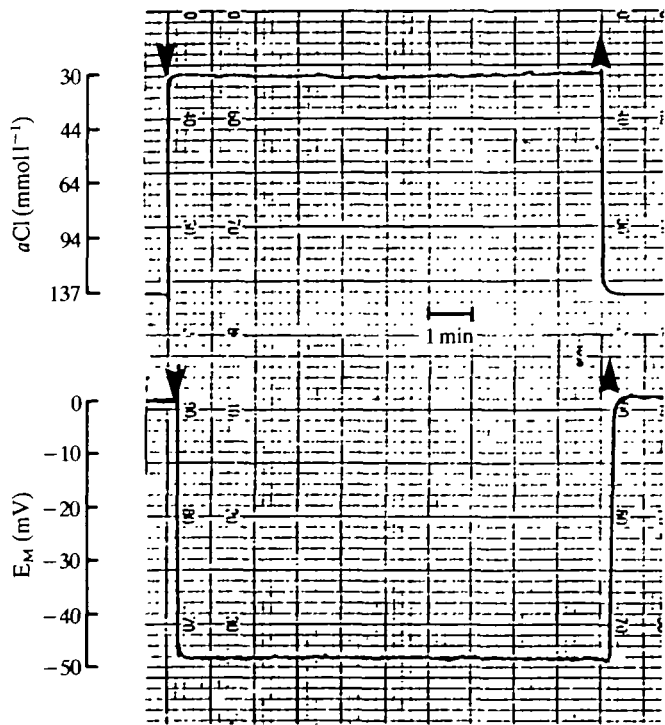

Fig. 7. Chart recording of the impalement of a *Calliphora* prepupal muscle cell with a double-barrelled Cl<sup>-</sup>-sensitive microelectrode with a RLIE-filled reference barrel. Details of symbols etc. are as in the legend of Fig. 2.

To test the possibility that  $\text{Cl}^-$  was free to move across the membrane, the effect of removing all external  $\text{Cl}^-$  on  $a\text{Cl}_i$  and  $E_M$  was investigated (Fig. 10). For this cell,  $a\text{Cl}_i$  was  $58 \text{ mmol l}^{-1}$  and  $E_M$  was  $-44 \text{ mV}$ . When  $\text{Cl}^-$ -free Ringer was applied,  $E_M$  immediately hyperpolarized by about  $10 \text{ mV}$ , and then gradually recovered back to the original level over about  $1 \text{ min}$ .  $a\text{Cl}_i$  decreased steadily, however, and reached a final value of  $13 \text{ mmol l}^{-1}$ , which was maintained. Upon washing with normal Ringer,  $E_M$  again hyperpolarized transiently, by about the

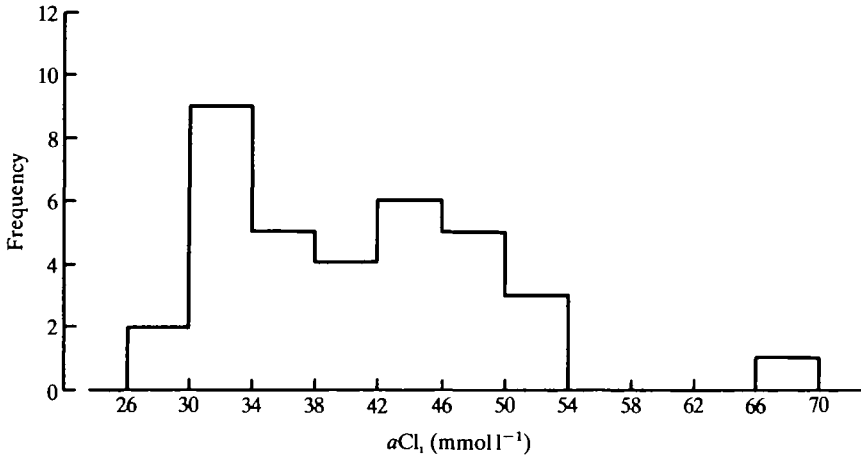

Fig. 8. Frequency histogram illustrating the distribution of intracellular  $\text{Cl}^-$  activity ( $a\text{Cl}_i$ ) values, measured using double-barrelled  $\text{Cl}^-$ -sensitive microelectrodes.

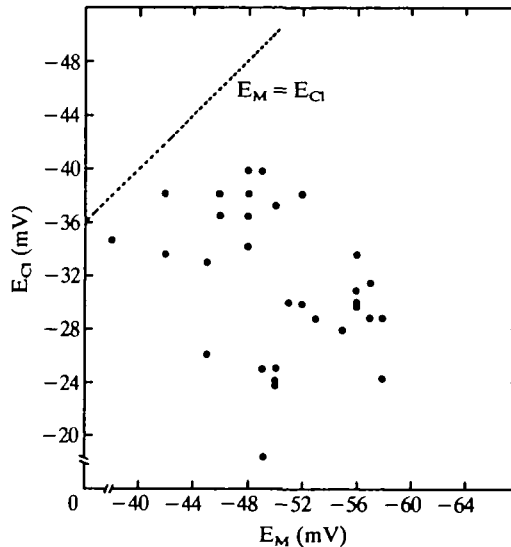

Fig. 9. Graph to illustrate the relationship between the  $\text{Cl}^-$  equilibrium potential ( $E_{\text{Cl}}$ ) and resting membrane potential ( $E_M$ ) in *Calliphora* prepupal muscle cell. The dashed line denotes the equality  $E_{\text{Cl}} = E_M$ , showing that for all cells  $E_{\text{Cl}}$  is consistently more positive than  $E_M$  and that there is no obvious relationship between  $E_{\text{Cl}}$  and  $E_M$ .

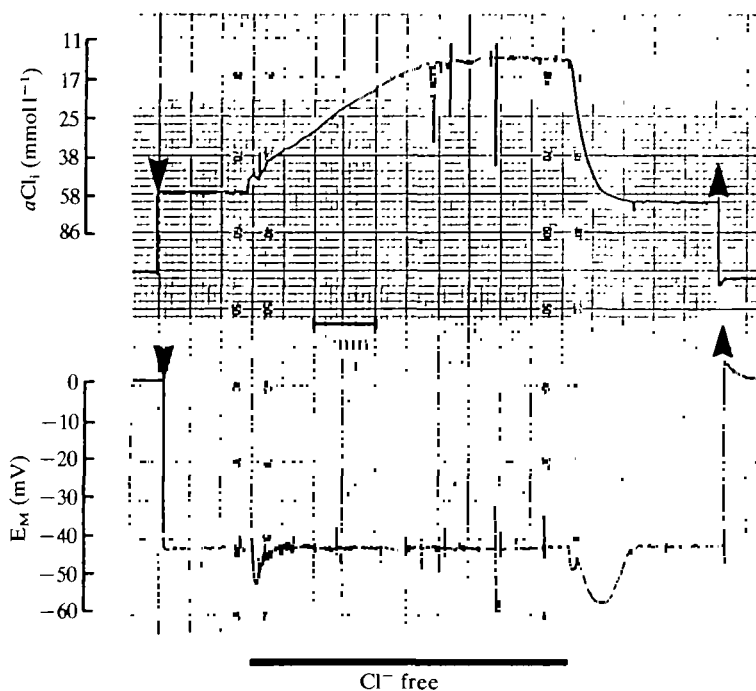

Fig. 10. Chart recording of a typical experiment demonstrating the effects of a  $\text{Cl}^-$ -free medium on  $E_M$  (resting membrane potential) and  $a\text{Cl}_i$  (intracellular  $\text{Cl}^-$  activity). Gluconate salts were used as substitutes to remove all  $\text{Cl}^-$  from the bathing medium; the duration of application of the  $\text{Cl}^-$ -free medium is indicated by the thick horizontal bar. At both changes,  $E_M$  hyperpolarizes only transiently, but during sustained application, there is a gradual loss of intracellular  $\text{Cl}^-$ . Arrowheads, as in the legend of Fig. 2.

same magnitude;  $a\text{Cl}_i$  returned to the original 'resting' value, but the time course of the cell's reloading with  $\text{Cl}^-$  was much faster than that of its unloading (Fig. 10). Similar results were obtained from seven cells from seven different preparations. On average, for this group of cells,  $E_M$  was  $-50 \pm 3$  mV and  $a\text{Cl}_i$  was  $43 \pm 5$  mmol  $\text{l}^{-1}$ , and changing external  $\text{Cl}^-$  concentration produced only transient  $E_M$  hyperpolarizations of 9–16 mV. In zero external  $\text{Cl}^-$ , the cells rapidly lost their intracellular  $\text{Cl}^-$ , leaving an apparent  $a\text{Cl}_i$  of  $10 \pm 1$  mmol  $\text{l}^{-1}$ . When the  $\text{Cl}^-$ -free Ringer was introduced with the ISM tip in the bath, the potential difference between the reference barrel of the ISM and the earth electrode did not change significantly. Thus, the changes in  $E_M$  observed could not be due to any change in junction potential(s).

### Discussion

The intracellular  $\text{K}^+$  activities ( $a\text{K}_i$ ) of prepupal muscle cells of *Calliphora* have been measured using  $\text{K}^+$ -SMs for the first time. The values obtained with  $\text{K}^+$ -SMs

employing the ion-exchanger were found to be considerably higher than those obtained with  $K^+$ -SMs based on the neutral ion-carrier. This probably reflects the presence of certain interfering organic compound(s), such as quarternary amines (Oehme & Simon, 1976). Thus, the average value of  $115 \text{ mmol l}^{-1}$  obtained using NIC-type  $K^+$ -SMs is certainly a more realistic measurement in these cells.

Intracellular  $Na^+$  concentrations of skeletal muscles of *Periplaneta*, *Locusta* and *Schistocerca*, measured by flame photometry, lie in the range  $21\text{--}62 \text{ mmol l}^{-1}$  (Tobias, 1948a,b; Wood, 1963). Assuming that  $aNa_i$  values of these insect muscles are close to that of *Calliphora*, since all are bathed in haemolymphs with similar ionic contents, it follows that a substantial amount of bound  $Na^+$  exists in the skeletal muscles of the insects studied earlier. However, X-ray microanalysis of *Calliphora* rectal muscles has given an overall intracellular  $Na^+$  concentration of only  $11 \text{ mmol l}^{-1}$  (Gupta, Wall, Oschman & Hall, 1980). Thus, either *Calliphora* muscles have relatively low intracellular  $Na^+$  concentrations compared with the other insects (i.e. the above assumption is not valid), or visceral and skeletal muscles of *Calliphora* are markedly different in their  $Na^+$  contents. Further work is required on *Calliphora* to clarify this point.

Removing all external  $Cl^-$  clearly shows that (i) intracellular  $Cl^-$  is lost rapidly, and (ii) the resting membrane potential changes only transiently, i.e.  $Cl^-$  is free to be exchanged rapidly across the cell membrane in either direction and makes no net direct contribution to the generation of the membrane potential. Taken together, these results strongly suggest that the transmembrane distribution of  $Cl^-$  is in passive equilibrium with the resting potential, possibly in accordance with a Donnan system. In turn, this implies that  $aCl_i$  has been overestimated, probably due to the presence of an anionic interferent in prepupal cells (see Deisz & Lux, 1982). Since the cells on which  $Cl^-$  depletion experiments were carried out had an average  $E_M$  of  $-50 \text{ mV}$  and  $aCl_i$  of  $43 \text{ mmol l}^{-1}$ , and  $Cl^-$  appears to be passively distributed, the true  $aCl_i$  would be expected to have an average value of  $19 \text{ mmol l}^{-1}$ , with the interfering ion(s) accounting for some  $24 \text{ mmol l}^{-1}$  'apparent'  $aCl_i$ . The identity of the interferent(s) is not known, however.

The response of the cell membrane to lowered extracellular  $Cl^-$  level was somewhat unexpected. Instead of the transient *depolarization* predicted from a simple Donnan equilibrium, a *hyperpolarization* was observed. This hyperpolarization of the membrane may be attributable to a number of mechanisms. First,  $Cl^-$  may be involved in the regulation of intracellular pH, and a reduction in extracellular  $Cl^-$  might therefore change intracellular pH by affecting the  $Cl^-/HCO_3^-$  exchange mechanism (Thomas, 1977, 1984). Intracellular pH controls a wide spectrum of membrane functions (Moody, 1984) and a change might have an indirect effect on  $E_M$  (see Washio, 1971; Jan & Jan, 1976; Piek, Mantel & Wijsman, 1977). Second, lowering extracellular  $Cl^-$  level may indeed lead to a very small depolarization which may be sufficient under the prevailing experimental conditions to increase the permeability of the cell membrane to an ion such as  $K^+$ , thus causing the  $E_M$  to hyperpolarize. This could occur *via* voltage-sensitive, self-inactivating  $K^+$  channels such as those found in *Drosophila* flight muscle

(Salkoff & Wyman, 1983). Such channels would be activated immediately following the onset of a small depolarization and might result in the observed transient hyperpolarization of  $E_M$ . This seems unlikely, however, since these channels operate on a time scale of milliseconds, and there was no hint of even a slight depolarization when cells were first exposed to a  $\text{Cl}^-$ -free Ringer. Irrespective of the mechanism of this effect,  $\text{Cl}^-$  is clearly not involved in resting membrane electrogenesis in *Calliphora* muscles. A similar conclusion was reached by Jan & Jan (1976) in analogous muscles of prepupal *Drosophila*, since replacing all  $\text{Cl}^-$  in the bathing medium with sulphate was similarly found to affect the membrane potential only transiently by 10–20 mV. On returning to normal saline, 80–90 % of the resting potentials recovered within 10 min. Sulphate was taken to be an impermeant ion, since replacing the sucrose present in the saline with Tris(hydroxylaminomethane sulphate) had no effect on the membrane potential.

In conclusion, these observations taken together strongly suggest that  $\text{Cl}^-$  is passively distributed in Diptera skeletal muscles, and does not, therefore, directly generate any part of the resting membrane potential. This is very similar to the situation in Orthoptera skeletal muscles, which are also bathed in haemolymphs with 'conventional' ion contents (Usherwood, 1969; Lea & Usherwood, 1973). The intracellular  $\text{Cl}^-$  concentrations of *Locusta* skeletal muscles were originally measured, using a classical microtitration method, by Wood (1965). In freshly dissected muscles (bathed in a haemolymph  $\text{Cl}^-$  concentration of  $94 \text{ mmol l}^{-1}$ ), the intracellular  $\text{Cl}^-$  concentration was  $14 \text{ mmol l}^{-1}$ . The intracellular  $\text{Cl}^-$  concentration measurements were repeated and the resting potentials also recorded after soaking the muscles in an artificial saline containing  $150 \text{ mmol l}^{-1} \text{ Cl}^-$ , giving values of  $44 \text{ mmol l}^{-1}$  and  $-56 \text{ mV}$ , respectively (Wood, 1965). These results have two implications. (i)  $\text{Cl}^-$  is 'free' to enter the cells once the extracellular  $\text{Cl}^-$  concentration is raised. This is consistent with the results of Lea & Usherwood (1973). (ii) A substantial amount of 'bound'  $\text{Cl}^-$  exists in these muscles such that the  $E_{\text{Cl}}$ , calculated using a  $\text{Cl}^-$  concentration value from homogenized muscle, is apparently more positive than the resting potential (Wood, 1965; Piek, 1975). Further aspects of  $\text{Cl}^-$  in insect muscles have been discussed in considerable detail by Djamgoz (1987).

Assuming that the intracellular activity coefficient for  $\text{K}^+$  is the same as the extracellular one (i.e. 0.72), the average value of  $aK_i$  found is equivalent to a  $\text{K}^+$  concentration of  $160 \text{ mmol l}^{-1}$ , which is comparable to the value of  $140 \text{ mmol l}^{-1}$  reported in isolated retractor unguis muscles of *Schistocerca gregaria* (Leech, 1986). The value of  $aK_i$  in *Calliphora* corresponds to an average  $E_K$  of  $-62 \text{ mV}$ , which is considerably more negative than the average resting potential of  $-47 \text{ mV}$ . This, in turn, implies that  $\text{K}^+$  is not the only ion contributing to resting membrane electrogenesis, and that at least one other ion with an equilibrium potential more positive than  $E_M$  must also be involved. This additional ion cannot be  $\text{Cl}^-$ , but it may be  $\text{Na}^+$ . In the following paper (Djamgoz & Dawson, 1988), a quantitative model of resting membrane electrogenesis, based on partial contributions from  $\text{K}^+$  and  $\text{Na}^+$ , is formulated and its predictions are tested by a variety of experiments.

This study was supported by an SERC-CASE studentship to JD (ICI plc as collaborating body). We thank Drs J. Hardie and S. Irving for many useful discussions.

### References

- BAUMGARTEN, C. M. (1981). An improved liquid ion exchanger for chloride ion-selective microelectrodes. *Am. J. Physiol.* **241**, C258-C263.
- CROSSLEY, A. C. (1965). Transformation in the abdominal muscles of the blue blowfly, *Calliphora erythrocephala* (Meig.), during metamorphosis. *J. Embryol. exp. Morph.* **14**, 89-110.
- DAWSON, J. & DJAMGOZ, M. B. A. (1983). Intracellular potassium activities of blowfly larval muscle cells. *J. Physiol., Lond.* **343**, 30P-31P.
- DAWSON, J. & DJAMGOZ, M. B. A. (1984a). The contribution of potassium ions to membrane electrogenesis in body-wall muscle cells of blowfly larvae. *J. Physiol., Lond.* **353**, 80P.
- DAWSON, J. & DJAMGOZ, M. B. A. (1984b). Distribution of chloride ions in the body-wall muscle cells of insect larvae: a comparison between Diptera and Lepidoptera. *J. Physiol., Lond.* **354**, 48P.
- DEISZ, R. A. & LUX, H. D. (1982). The role of intracellular chloride in hyperpolarizing post-synaptic inhibition of crayfish stretch receptor neurones. *J. Physiol., Lond.* **326**, 123-138.
- DEITMER, J. W. & SCHLUE, W. R. (1983). Intracellular Na<sup>+</sup> and Ca<sup>2+</sup> in leech Retzius neurones during inhibition of the Na<sup>+</sup>-K<sup>+</sup> pump. *Pflügers Arch. ges. Physiol.* **397**, 195-201.
- DJAMGOZ, M. B. A. (1987). Insect muscle: Intracellular ion concentrations and mechanisms of resting potential generation. *J. Insect Physiol.* **33**, 287-314.
- DJAMGOZ, M. B. A. & DAWSON, C. J. (1986). Procedures for manufacturing double-barrelled ion-sensitive microelectrodes employing liquid sensors. *J. biochem. biophys. Methods* **13**, 9-21.
- DJAMGOZ, M. B. A. & DAWSON, C. J. (1988). Quantitative analysis of resting membrane electrogenesis in insect (Diptera) skeletal muscle. II. Testing of a model involving contributions from potassium and sodium ions, and the anomalous effect of reducing extracellular sodium. *J. exp. Biol.* **136**, 433-449.
- DJAMGOZ, M. B. A. & LAMING, P. J. (1987a). Intracellular potassium activities of horizontal cells and extracellular potassium activity in isolated retinæ of a cyprinid fish. *Vision Res.* **27**, 711-721.
- DJAMGOZ, M. B. A. & LAMING, P. J. (1987b). Microelectrode measurements and functional aspects of chloride activity in a cyprinid fish retina: extracellular activity and intracellular activities of L- and C-type horizontal cells. *Vision Res.* **27**, 1481-1489.
- FINLAYSON, L. H. & OSBORNE, M. P. (1970). Electrical activity of neurohaemal tissue in the stick insect, *Carausius morosus*. *J. Insect Physiol.* **16**, 791-800.
- GUPTA, B. L., WALL, B. J., OSCHMAN, J. L. & HALL, T. A. (1980). Direct microprobe evidence of local concentration gradients and recycling of electrolytes during fluid absorption in the rectal papillae of *Calliphora*. *J. exp. Biol.* **88**, 21-47.
- HARDIE, J. (1976). Motor innervation of the supercontracting longitudinal ventro-lateral muscles of the blowfly larva. *J. Insect Physiol.* **22**, 661-668.
- JAN, L. Y. & JAN, Y. N. (1976). Properties of the larval neuromuscular junction in *Drosophila melanogaster*. *J. Physiol., Lond.* **262**, 215-236.
- KENYON, J. L. & GIBBONS, W. R. (1977). Effects of low-chloride solutions on action potentials of sheep cardiac Purkinje fibres. *J. gen. Physiol.* **70**, 635-660.
- LEA, T. J. & USHERWOOD, P. N. R. (1973). Effect of ibotenic acid on chloride permeability of insect muscle fibres. *Comp. gen. Pharmac.* **4**, 351-363.
- LEECH, C. A. (1986). Resting potential and potassium-selective electrode measurements in locust skeletal muscles. *J. exp. Biol.* **122**, 439-442.
- MOODY, W., JR (1984). Effects of intracellular H<sup>+</sup> on the electrical properties of excitable cells. *A. Rev. Neurosci.* **7**, 257-278.

- OEHME, M. & SIMON, W. (1976). Microelectrode for potassium ions based on a neutral carrier and comparison of its characteristics with a cation exchanger sensor. *Analytica chim. Acta* **86**, 21–25.
- PICHON, Y. & ASHCROFT, F. M. (1985). Nerve and muscle: Electrical activity. In *Comprehensive Insect Physiology, Biochemistry and Pharmacology*, vol. 5, *Nervous System: Structure and Motor Function* (ed. G. A. Kerkut & L. J. Gilbert), pp. 85–113. Oxford: Pergamon Press.
- PIEK, T. (1975). Ionic and electrical properties. In *Insect Muscle*, chapter 5 (ed. P. N. R. Usherwood), pp. 281–336. New York: Academic Press.
- PIEK, T. (1985). Neurotransmission and neuromodulation of skeletal muscles. In *Comprehensive Insect Physiology, Biochemistry and Pharmacology*, vol. 11, *Nervous System: Structure and Motor Function* (ed. G. A. Kerkut & L. J. Gilbert), pp. 55–118. Oxford: Pergamon Press.
- PIEK, T., MANTEL, P. & WIJSMAN, J. P. M. (1977). Effects of monocarboxylates and external pH on some parameters of insect muscle fibres. *J. Insect Physiol.* **23**, 773–777.
- PIEK, T. & NJLO, K. D. (1979). Morphology and electrochemistry of insect muscle fibre membrane. *Adv. Insect Physiol.* **15**, 185–249.
- SALKOFF, L. & WYMAN, R. (1983). Ion channels in *Drosophila* muscle. *Trends Neurosci.* **6**, 128–133.
- STEINER, R. A., OEHME, M., AMMANN, D. & SIMON, W. (1979). Neutral carrier sodium ion-selective microelectrode for intracellular studies. *Analyt. Chem.* **51**, 351–353.
- THOMAS, R. C. (1977). The role of bicarbonate, chloride and sodium ions in the regulation of intracellular pH in snail neurones. *J. Physiol., Lond.* **273**, 317–338.
- THOMAS, R. C. (1984). Experimental displacement of intracellular pH and the mechanism of its subsequent recovery. *J. Physiol., Lond.* **354**, 3P–22P.
- THOMAS, R. C. & COHEN, J. C. (1981). A liquid ion-exchanger alternative to KCl for filling intracellular reference microelectrodes. *Pflügers Arch. ges. Physiol.* **390**, 96–98.
- TOBIAS, J. M. (1948a). Potassium, sodium and water interchange in irritable tissues and haemolymph of an omnivorous insect *Periplaneta americana*. *J. cell. comp. Physiol.* **31**, 125–142.
- TOBIAS, J. M. (1948b). The high potassium and low sodium in the body fluid and tissues of a phytophagous insect, the silkworm *Bombyx mori* and the change before pupation. *J. cell. comp. Physiol.* **31**, 143–148.
- TSIEN, R. Y. (1980). Liquid sensors of ion-selective microelectrodes. *Trends Neurosci.* **3**, 219–220.
- USHERWOOD, P. N. R. (1969). Electrochemistry of insect muscle. *Adv. Insect Physiol.* **6**, 205–278.
- USHERWOOD, P. N. R. & CULL-CANDY, S. G. (1975). Pharmacology of somatic nerve-muscle synapses. In *Insect Muscle*, chapter 4 (ed. P. N. R. Usherwood), pp. 207–256. New York: Academic Press.
- VAUGHAN-JONES, R. D. (1979). Non-passive chloride distribution in mammalian heart muscles: microelectrode measurement of the intracellular chloride activity. *J. Physiol., Lond.* **295**, 83–109.
- WALKER, J. L. (1971). Ion-specific liquid ion-exchanger microelectrodes. *Analyt. Chem.* **43**, 89–92.
- WASHIO, H. (1971). The chloride conductance and its pH sensitivity in insect muscle. *Can. J. Physiol. Pharmacol.* **49**, 1012–1014.
- WEAST, R. C. (ed.) (1971). *Handbook of Chemistry and Physics*. Cleveland: CRC Press.
- WOOD, D. W. (1963). The sodium and potassium composition of some insect skeletal muscle fibres in relation to their membrane potentials. *Comp. Biochem. Physiol.* **9**, 151–159.
- WOOD, D. W. (1965). The relationship between chloride ions and resting potential in skeletal muscle fibres of the locust and cockroach. *Comp. Biochem. Physiol.* **15**, 303–312.
